# Supplementary material for: Evolution of cost structures in rheumatoid arthritis over the past decade
Source: HighWire-hosted journal article supplement (doi:10.1136/annrheumdis-2013-204311), 2014-01-10
Supplement: annrheumdis-2013-204311supp3.pdf [file annrheumdis-2013-204311supp3.pdf]

**Table S3: Subgroup of patients with disease duration 2-10 years: average direct and indirect annual costs (in €) for the age 18-64 years, and average direct annual costs (in €), age ≥65 years; calculated with current prices.**

|                               | 2002          | 2003          | 2004          | 2005          | 2006          | 2007          | 2008          | 2009          | 2010          | 2011          |
|-------------------------------|---------------|---------------|---------------|---------------|---------------|---------------|---------------|---------------|---------------|---------------|
| <b>Age 18-64 yrs</b>          |               |               |               |               |               |               |               |               |               |               |
| Cases (n)                     | 950           | 934           | 939           | 634           | 648           | 670           | 600           | 562           | 646           | 685           |
| Disease duration (median)     | 5.8           | 5.6           | 5.7           | 5.6           | 5.5           | 5.4           | 5.3           | 5.6           | 5.7           | 5.6           |
| Drugs                         | 2,212         | 3,211         | 2,781         | 4,404         | 4,608         | 4,387         | 3,835         | 5,257         | 5,335         | 5,401         |
| Biologic DMARDs               | 1,217         | 2,245         | 1,863         | 3,583         | 3,713         | 3,301         | 2,828         | 4,156         | 4,232         | 4,416         |
| Synthetic DMARDs              | 660           | 637           | 581           | 458           | 549           | 683           | 673           | 698           | 711           | 614           |
| Other antirheumatic drugs     | 334           | 329           | 337           | 362           | 347           | 404           | 334           | 403           | 393           | 371           |
| Hospitalisation               | 1,104         | 1,088         | 1,253         | 788           | 796           | 840           | 924           | 761           | 1,086         | 1,014         |
| Rehabilitation                | 318           | 253           | 248           | 240           | 159           | 122           | 168           | 135           | 229           | 212           |
| Other treatment costs         | 585           | 562           | 517           | 599           | 606           | 525           | 427           | 349           | 489           | 527           |
| Physician visits              | 335           | 321           | 323           | 322           | 329           | 323           | 329           | 220           | 332           | 338           |
| Joint replacement surgery     | 120           | 114           | 65            | 178           | 178           | 112           | 29            | 47            | 68            | 73            |
| Physiotherapy                 | 84            | 83            | 83            | 56            | 57            | 43            | 24            | 38            | 43            | 62            |
| Imaging                       | 46            | 44            | 46            | 43            | 42            | 48            | 44            | 44            | 46            | 55            |
| <b>Total direct costs</b>     | <b>4,219</b>  | <b>5,115</b>  | <b>4,798</b>  | <b>6,031</b>  | <b>6,169</b>  | <b>5,874</b>  | <b>5,353</b>  | <b>6,501</b>  | <b>7,139</b>  | <b>7,154</b>  |
| Sick leave                    | 1,662         | 1,488         | 1,940         | 800           | 1,051         | 868           | 1,168         | 889           | 938           | 989           |
| <b>Friction cost approach</b> |               |               |               |               |               |               |               |               |               |               |
| Permanent work disability     | 1,275         | 1,056         | 1,182         | 1,200         | 1,090         | 995           | 964           | 913           | 1,008         | 871           |
| <b>Total indirect costs</b>   | <b>2,937</b>  | <b>2,544</b>  | <b>3,122</b>  | <b>2,000</b>  | <b>2,141</b>  | <b>1,863</b>  | <b>2,132</b>  | <b>1,802</b>  | <b>1,945</b>  | <b>1,860</b>  |
| <b>Total costs</b>            | <b>7,155</b>  | <b>7,659</b>  | <b>7,920</b>  | <b>8,030</b>  | <b>8,311</b>  | <b>7,737</b>  | <b>7,485</b>  | <b>8,303</b>  | <b>9,084</b>  | <b>9,014</b>  |
| <b>Human capital approach</b> |               |               |               |               |               |               |               |               |               |               |
| Permanent work disability     | 6,756         | 6,459         | 7,107         | 7,053         | 6,315         | 5,647         | 5,377         | 5,008         | 5,433         | 4,616         |
| <b>Total indirect costs</b>   | <b>8,417</b>  | <b>7,947</b>  | <b>9,047</b>  | <b>7,853</b>  | <b>7,367</b>  | <b>6,515</b>  | <b>6,546</b>  | <b>5,897</b>  | <b>6,371</b>  | <b>5,606</b>  |
| <b>Total costs</b>            | <b>12,636</b> | <b>13,062</b> | <b>13,845</b> | <b>13,883</b> | <b>13,536</b> | <b>12,389</b> | <b>11,899</b> | <b>12,398</b> | <b>13,509</b> | <b>12,759</b> |
| <b>Age ≥65 yrs</b>            |               |               |               |               |               |               |               |               |               |               |
| Cases (n)                     | 612           | 691           | 688           | 463           | 533           | 586           | 514           | 513           | 612           | 539           |
| Disease duration (median)     | 5.7           | 5.8           | 6.0           | 5.7           | 5.9           | 5.8           | 5.7           | 5.8           | 5.8           | 5.8           |
| Drugs                         | 1,556         | 2,183         | 2,133         | 2,361         | 3,170         | 2,407         | 2,694         | 3,418         | 2,723         | 2,515         |
| Biologic DMARDs               | 630           | 1,230         | 1,214         | 1,683         | 2,396         | 1,534         | 1,747         | 2,497         | 1,712         | 1,545         |
| Synthetic DMARDs              | 563           | 582           | 545           | 329           | 432           | 516           | 597           | 537           | 600           | 578           |
| Other antirheumatic drugs     | 363           | 372           | 374           | 348           | 343           | 357           | 350           | 384           | 411           | 391           |
| Hospitalisation               | 903           | 1,265         | 878           | 586           | 829           | 857           | 755           | 1,051         | 934           | 829           |
| Rehabilitation                | 261           | 196           | 157           | 140           | 128           | 131           | 133           | 121           | 119           | 78            |
| Other treatment costs         | 634           | 594           | 563           | 935           | 718           | 612           | 589           | 657           | 696           | 686           |
| Physician visits              | 312           | 312           | 312           | 341           | 354           | 349           | 350           | 349           | 355           | 351           |
| Joint replacement surgery     | 204           | 169           | 136           | 492           | 260           | 187           | 170           | 221           | 248           | 245           |
| Physiotherapy                 | 71            | 71            | 69            | 61            | 60            | 31            | 25            | 40            | 44            | 41            |
| Imaging                       | 46            | 43            | 46            | 41            | 45            | 46            | 44            | 47            | 49            | 49            |
| <b>Total (direct) costs</b>   | <b>3,354</b>  | <b>4,237</b>  | <b>3,731</b>  | <b>4,021</b>  | <b>4,845</b>  | <b>4,007</b>  | <b>4,171</b>  | <b>5,247</b>  | <b>4,472</b>  | <b>4,107</b>  |
